# Supplementary material for: Ex Situ Catalytic Pyrolysis of Invasive Pennisetum purpureum Grass with Activated Carbon for Upgrading Bio-Oil
Source: MDPI journal article supplement (doi:10.3390/su15097628), 2023-05-06
Supplement: s1 [file s1]

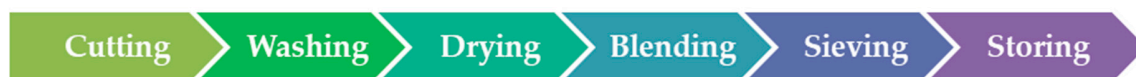

**Figure S1.** Biomass sample preparation diagram.

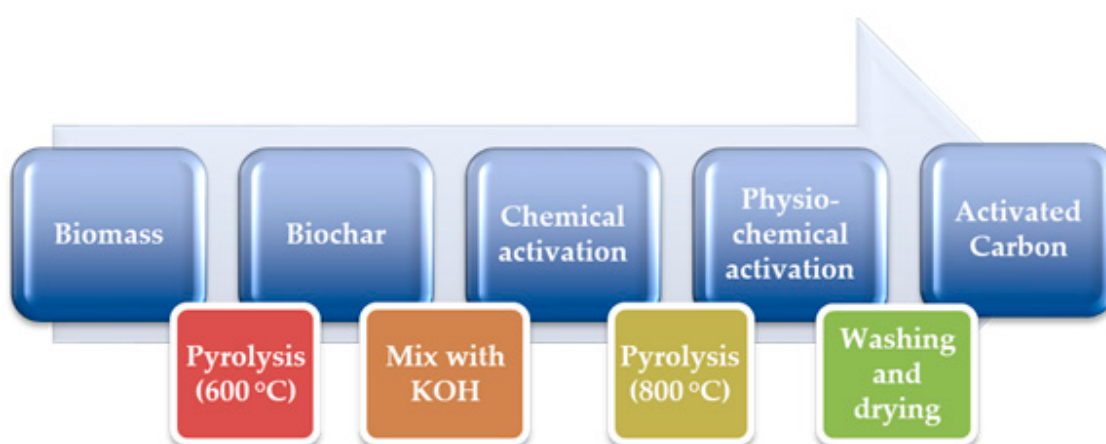

**Figure S2.** The preparation diagram of activated carbon.
